# Supplementary material
Source: Research Square preprint supplement (doi:10.21203/rs.3.rs-8912063/v1)
Supplement: Supplementary file 2 [file e5593a2856b61b6ca699797c.docx]

**Leaving Behind the Red Pen: Transforming Teacher Feedback Literacy and Reflective Practices through Artificial Intelligence**

**Abstract**

While Artificial Intelligence (AI) tools show promise in enhancing educational feedback processes, research on prospective teachers' readiness to incorporate these tools remains limited. This quasi-experimental study investigated how AI integration affects the development of feedback literacy and reflective practice skills among prospective English teachers. The study involved 59 third and fourth-year English Language Teaching students divided into experimental (n=29) and control (n=30) groups. Both groups received identical theoretical training on feedback literacy; however, the experimental group used AI-assisted applications during practice sessions, while the control group employed traditional paper-and-pencil methods. Data were collected through the Teacher Reflective Practice Scale and Foreign Language Writing Teacher Feedback Literacy Scale over a six-week intervention period. Non-parametric analyses revealed that while groups showed similar baseline scores based on pre-test comparisons, the experimental group demonstrated significantly higher gains across all dimensions of feedback literacy (perceived knowledge, values, skills) and reflective practice (interpersonal, intrapersonal, critical, behavioral, strategic). These findings suggest that integrating AI tools into feedback processes can substantially enhance prospective teachers' professional development, offering implications for teacher education curricula.

**Keywords**: AI-assisted feedback, AI feedback literacy, teacher feedback literacy, teacher reflective practices, quasi-experimental design.

**Authors’ Bio**

Bengü AKSU ATAÇ, Assoc. Prof.

Affiliation: Nevsehir Haci Bektas Veli University, Faculty of Education. Nevsehir, Türkiye

Contact: [benguaksuatac@nevsehir.edu.tr](mailto:benguaksuatac@nevsehir.edu.tr)

ORCID ID – <https://orcid.org/0000-0002-4063-1021>

Fatih KARATAŞ, Instructor Dr. (Corresponding author)

Affiliation: Nevsehir Haci Bektas Veli University, School of Foreign Languages. Nevsehir, Türkiye

Contact: [fatih.karatas@nevsehir.edu.tr](mailto:fatih.karatas@nevsehir.edu.tr)

ORCID ID - <https://orcid.org/0000-0001-9633-2939>

**Declarations**

Ethical Approval. This research received ethical approval from the Scientific Research and Publication Ethics Committee at Nevsehir Hacı Bektas Veli University in Türkiye, as per decision number 2300079774.

**Declaration of generative AI and AI-assisted technologies in the writing process.** During the preparation of this research, the authors employed AI tools such as ChatGPT and DeepL for enhancing the fluency of the text, simplifying complex sentences for better clarity, explaining and justifying complicated constructs, and splitting lengthy sentences into shorter ones to ease comprehension. These applications assisted in ensuring the manuscript's readability while maintaining academic rigor. After using these AI tools, the author(s) reviewed and edited the content as necessary, taking full responsibility for the content of the publication. It's crucial to note that all data and findings come from properly cited sources, not AI-generated. The author(s) fully ensure the research's integrity and accuracy.

**Authors’ contributions.** Bengü AKSU ATAÇ crafted the introduction and discussion sections, establishing the study's framework, structured the research questions. Fatih KARATAŞ led the literature review, contributed to the method and results sections, managed the creation and execution of data collection tools, and developed the methodology, playing a key role in data gathering. Each author has reviewed and approved the final manuscript.

**Funding.** The author reports no funding.

**Data Availability.** The data and materials used in this study are available upon request from the corresponding author.

**Informed consent**

Written informed consent was obtained from all 59 English Language Teaching students. Consent was obtained in written form by [Insert Name] on [Insert Date] prior to the six-week intervention. Participants were fully informed about the research purpose, data utilization, and the absence of participation risks. Participants were assured of complete anonymity. The scope of the consent covers participation in the study and the publication of anonymized data.

**Competing interests.** The authors declare that they have no competing interests related to this research.
