# Supplementary material
Source: Research Square preprint supplement (doi:10.21203/rs.3.rs-8912063/v1)

**Appendix 1:** Student Writing Sample Selected for EFL Writing Feedback Practice


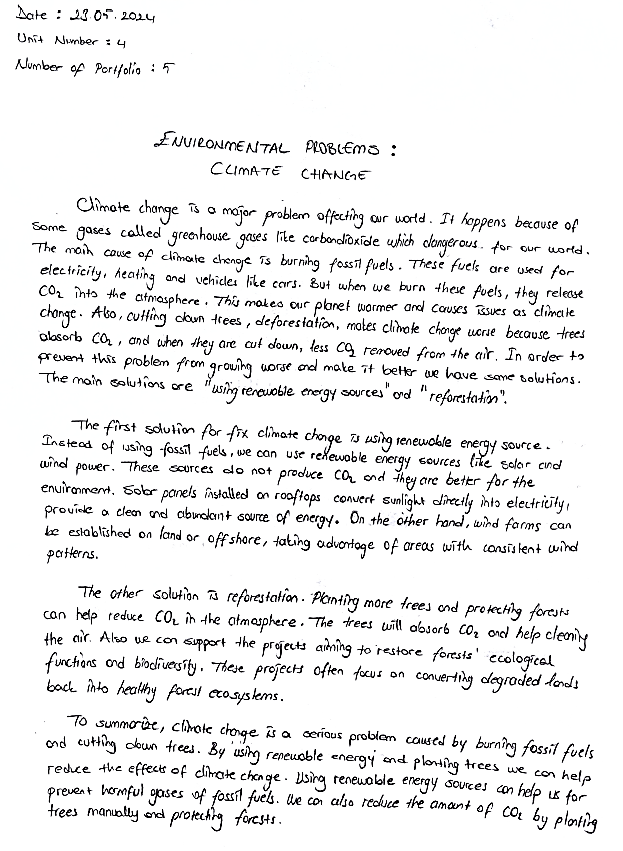


**Appendix 2:** Screenshots from Online AI-Assisted Feedback Training Sessions


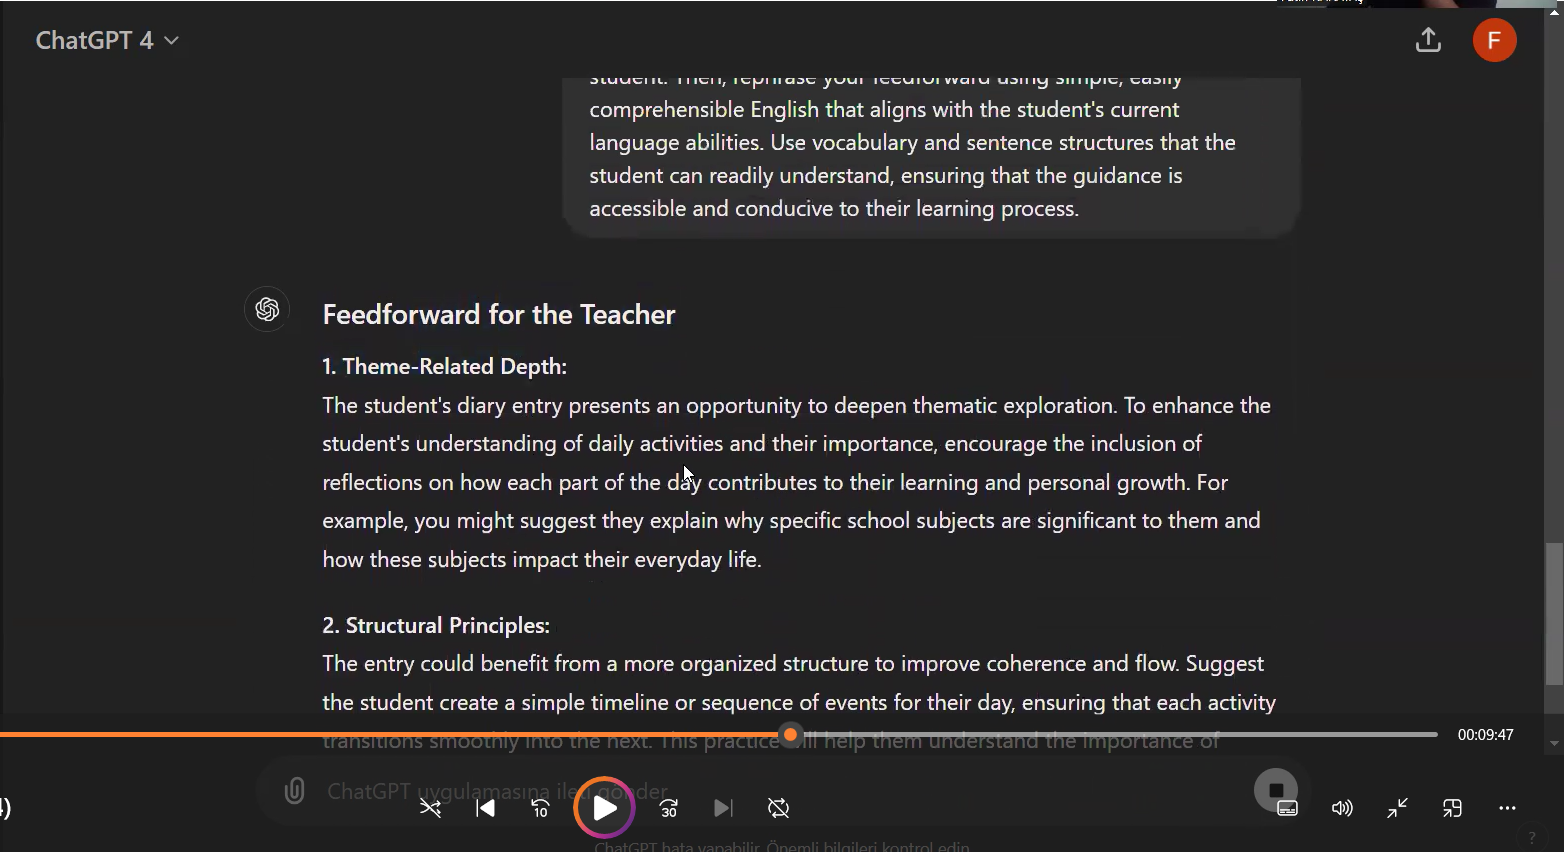

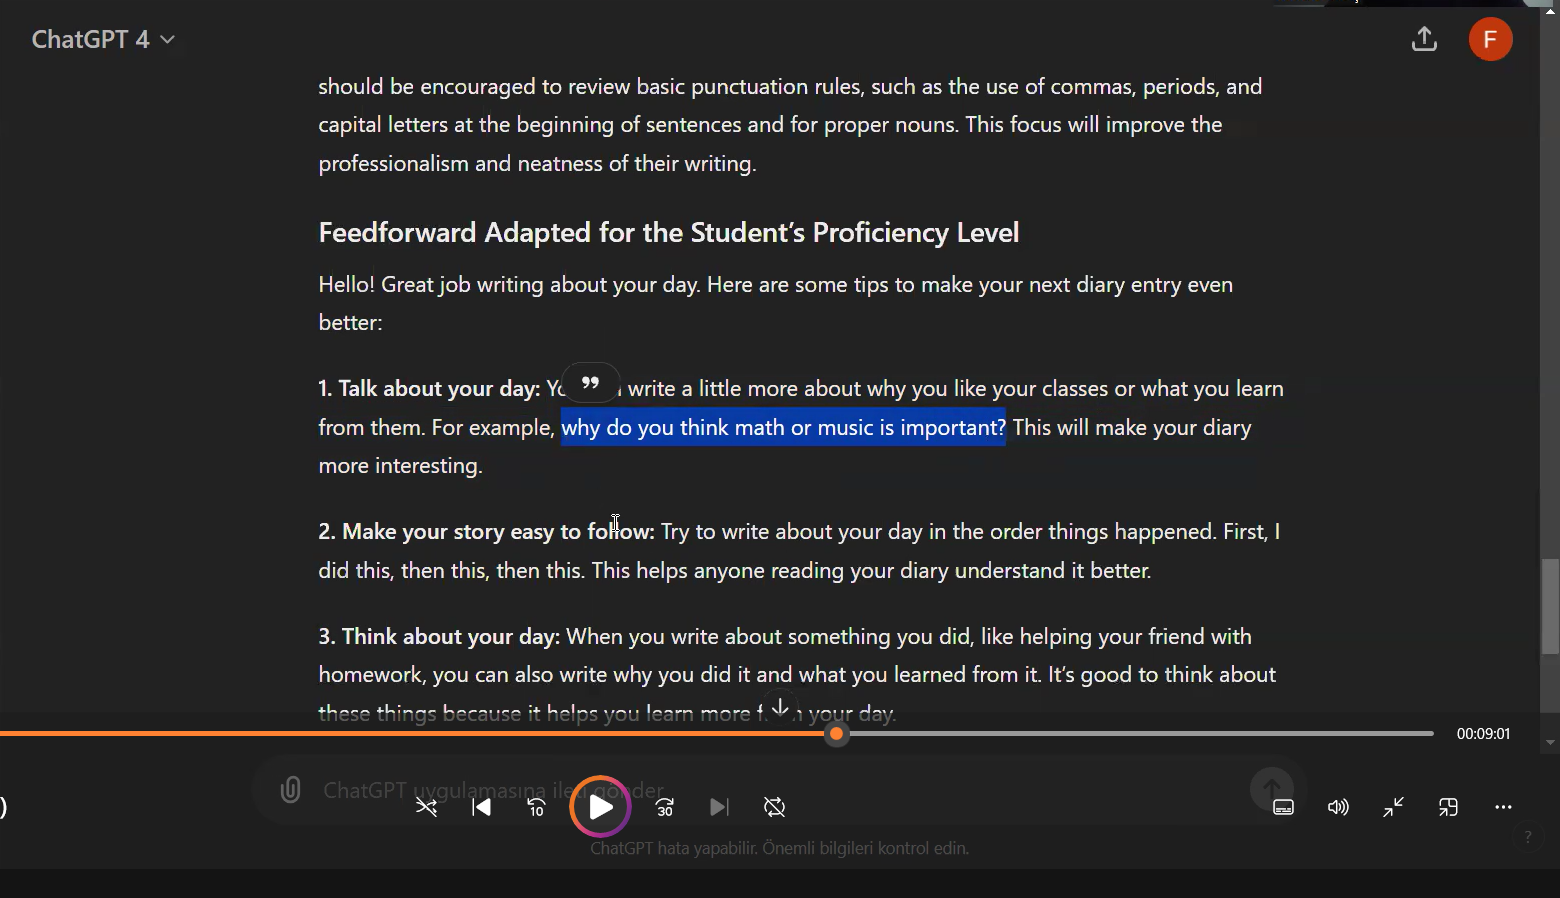


**Appendix 3:** Paper-Pencil Feedback Sample from Control Group Practice Sessions


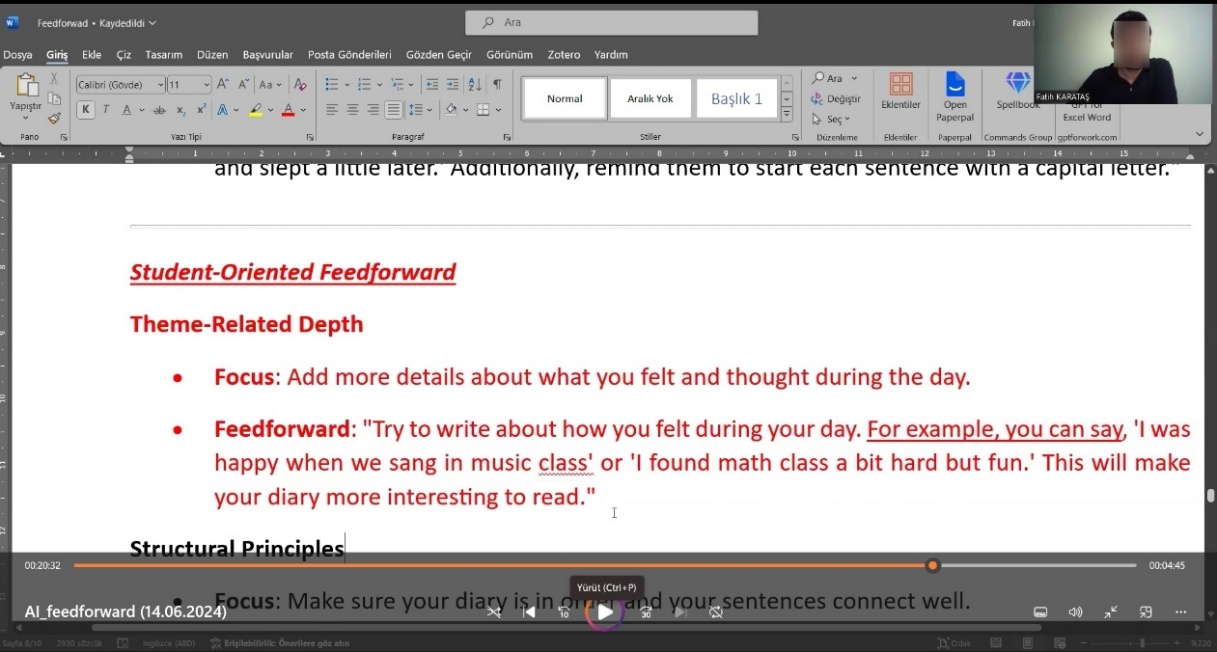

Supplement: Supplementary file 3 [file edd5f671f3f5d0c2790784d3.docx]
