# Supplementary material
Source: Research Square preprint supplement (doi:10.21203/rs.3.rs-8912063/v1)

**
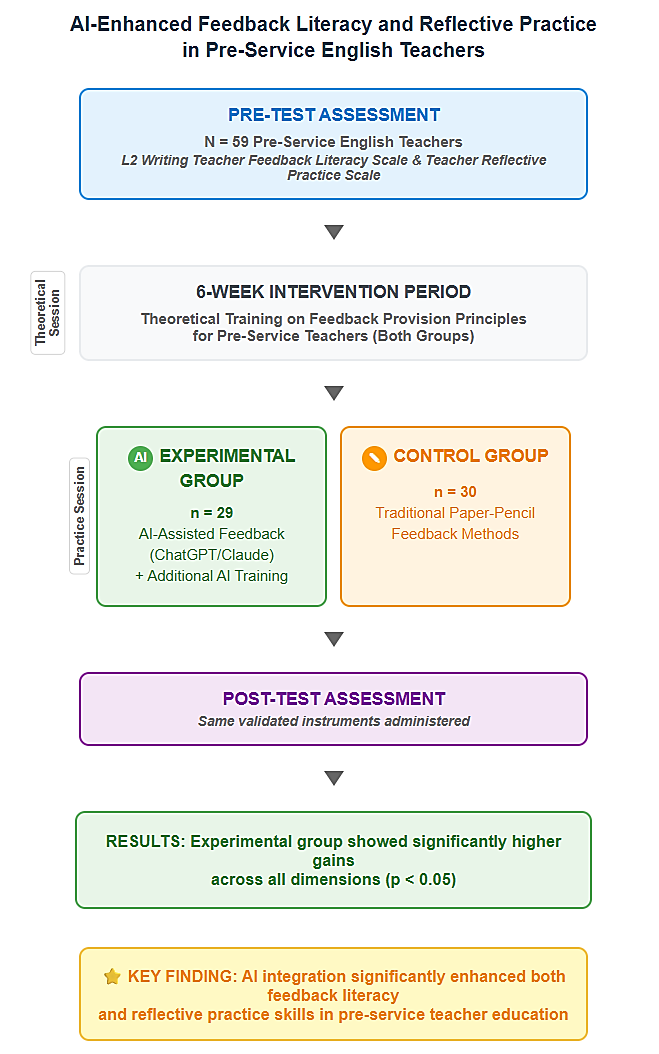
**

Supplement: Supplementary file 1 [file ac0c2876f3f7feffea740dc3.docx]
